# Supplementary material for: Quantitative histological image analyses of reticulin fibers in a myelofibrotic mouse
Source: PubMed Central journal article supplement (PMC5172452; doi:10.14440/jbm.2016.152), 2016-11-22
Supplement: NIHMS832418-supplement-Supplementary_Information.pdf [file NIHMS832418-supplement-Supplementary_Information.pdf]

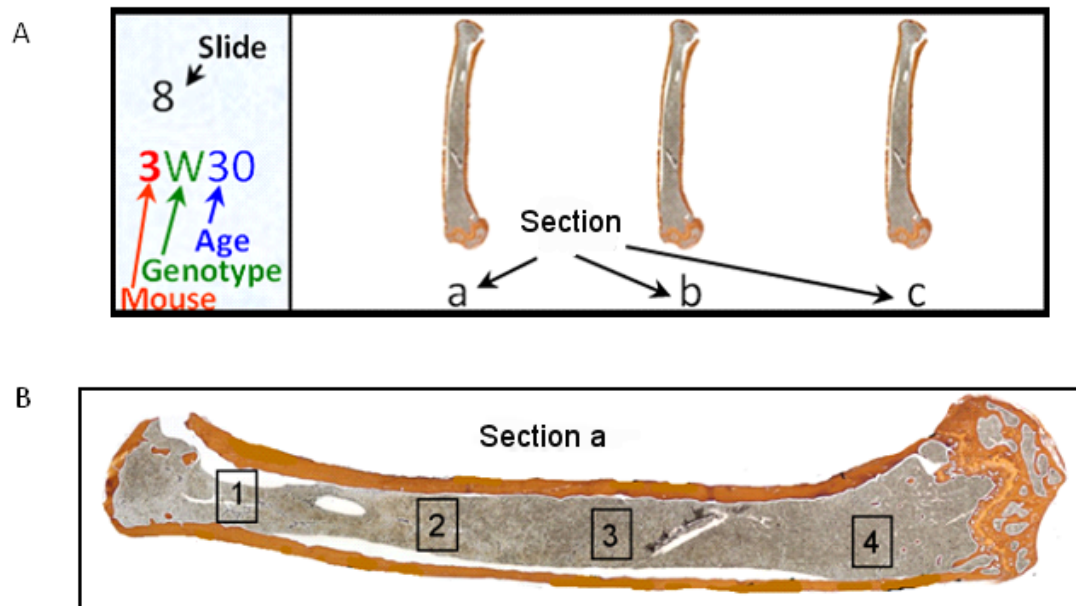

**Supplementary Figure S1. Slides arrangement: A)** Three bone sections corresponding to 5  $\mu\text{m}$  thick, consecutive cuts are placed in a slide. The slide labels include: slide number, animal ID, genotype and animal age. The bone sections are labeled “a”, “b” and “c” from the slide head to the bottom. A unique ID of the pictures taken from bone slices is facilitated by this arrangement. **B)** Illustrates the partial imaging collected along the femur diaphysis longitudinal axis.

Total Image Area: 1,920,000 pixels

Bone Marrow Area: 1,466,541

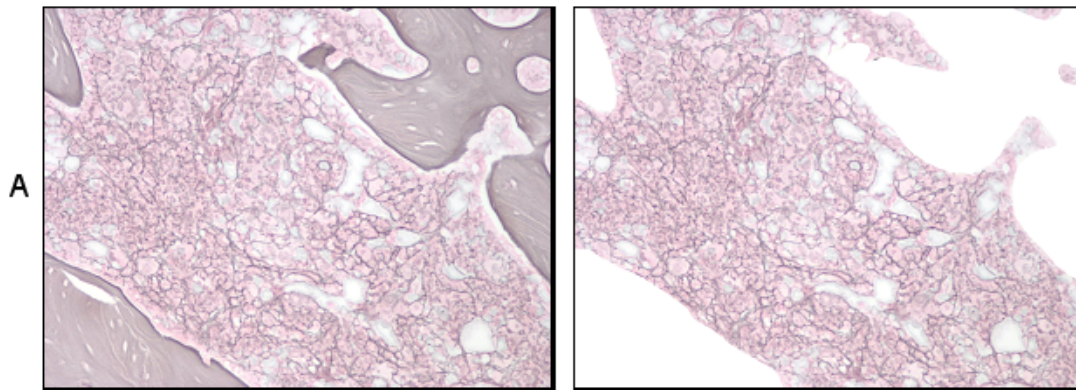

Ratio: Total Image Area/Bone Marrow Area = 1.31

| Area Correction Record |                |           |           |         | Nomalization of IntDen |                   |
|------------------------|----------------|-----------|-----------|---------|------------------------|-------------------|
| Number                 | ImageName      | TIA       | BMA       | TIA/BMA | Raw IntDen             | Normalized IntDen |
| 1                      | 1G30_8_a.tif   | 1,920,000 | 1,920,000 | 1.00    | 35,728                 | 35,728            |
| 2                      | 1G30_8_a_2.tif | 1,920,000 | 1,753,028 | 1.10    | 32,315                 | 35,393            |
| 3                      | 1G30_8_a_3.tif | 1,920,000 | 1,580,653 | 1.21    | 29,650                 | 36,015            |
| 4                      | 1G30_8_a_4.tif | 1,920,000 | 1,807,321 | 1.06    | 33,420                 | 35,504            |

Key: TIA, Total Image Area; BMA, Bone Marrow Area.

**Supplementary Figure S2. A. Representative image correction of a 30 week old Gata-1low male mouse.** Depicted on the left is the image with bone area and on the right the image after whitening the bone region. **B. Actual Bone Marrow Area.** Calculation of BM area in an image was described under Materials and Methods. This step also allows for the elimination of image artifacts and bone areas (image on the left). The table shows the output results and the normalization of raw IntDen by total image area. For a large number of images this process can be batched using the macro detailed in Supplementary Script S1.

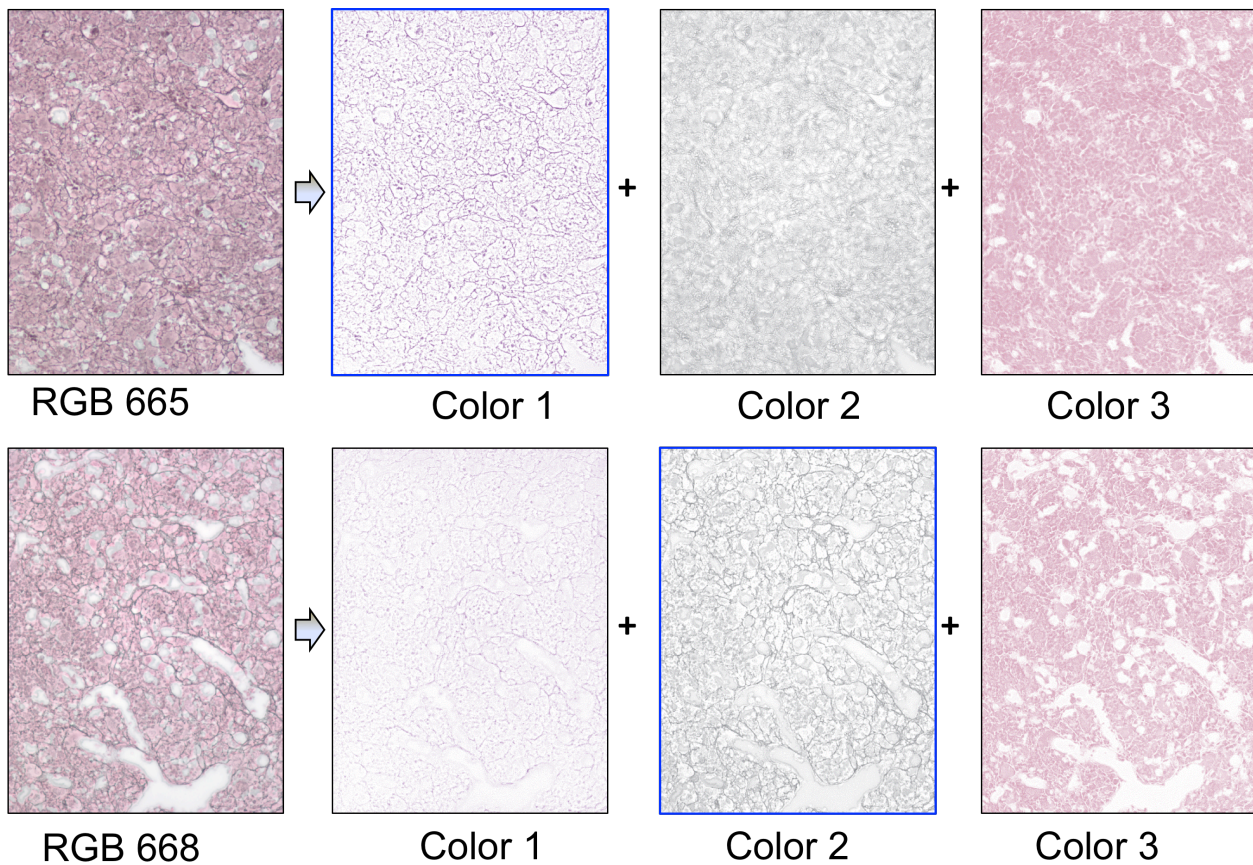

**Supplementary Figure S3. Color Deconvolution of Gomori Silver Impregnated BM Reticulin Fibers.** Two color images (665 and 668) from the same Gata-1 low male animal at 30 weeks of age were compared after color deconvolution (color1, color 2 and color 3 channels) using the Region Of Interest (ROI) values optimal for image 665. After color deconvolution, reticulin fibers from these images localized in different color channels (blue framed). User-defined ROI values for ImageJ color deconvolution analysis were: Color 1 = Red: 0.5015, Green: 0.7554, Blue: 0.4216; Color 2 = Red: 0.5917, Green: 0.5840, Blue: 0.5556, Color 3 = Red: 0.3191, Green: 0.7587, Blue: 0.5679.

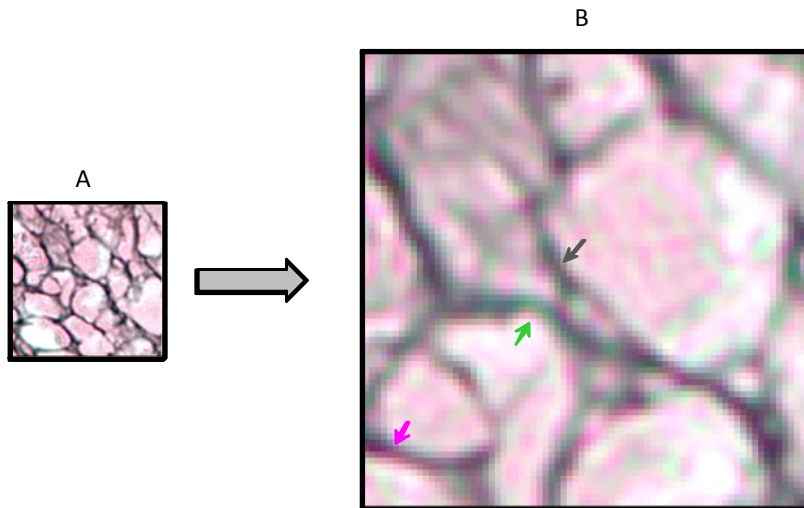

**Supplementary Figure S4. Polychromatic Nature of Reticulin Fibers Stained by Silver Impregnation:** A region of Gomori stained reticulin (A) is magnified to the point where fibers show jagged pixel edges (B). This reveals the color heterogeneity of the stained fibers (arrows).

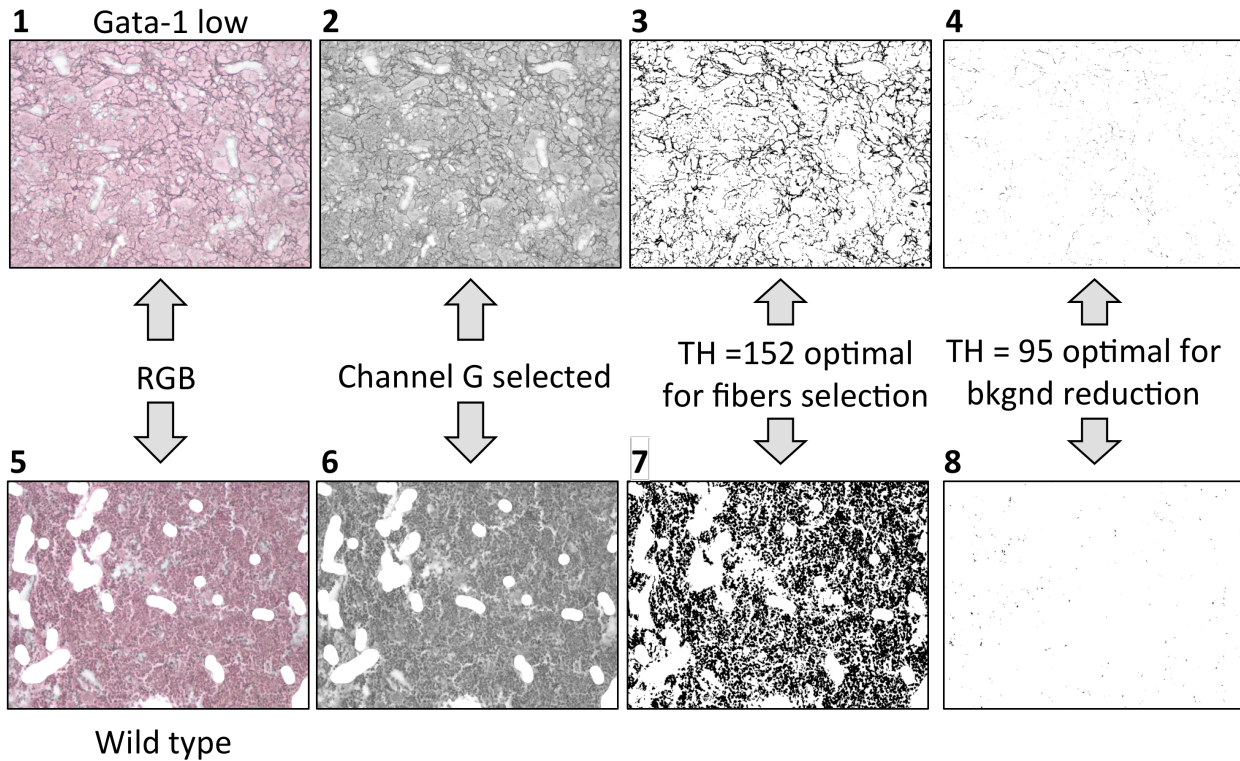

**Supplementary Figure S5. Constant vs. Variable Thresholding.** 20 weeks old male Gata-1 low (1) and matching male wild type (5) RGB images are split into their Red, Green and Blue channels and the G channels (2 and 6) are selected for threshold (TH) segmentation to isolate fiber shapes (3 and 7). A value of TH = 152 is optimal for Gata-1 low (3) while the same value is too high for the wild type (7). Conversely, a value of TH = 95 is optimal for wild type (8) but too low for Gata-1 low.

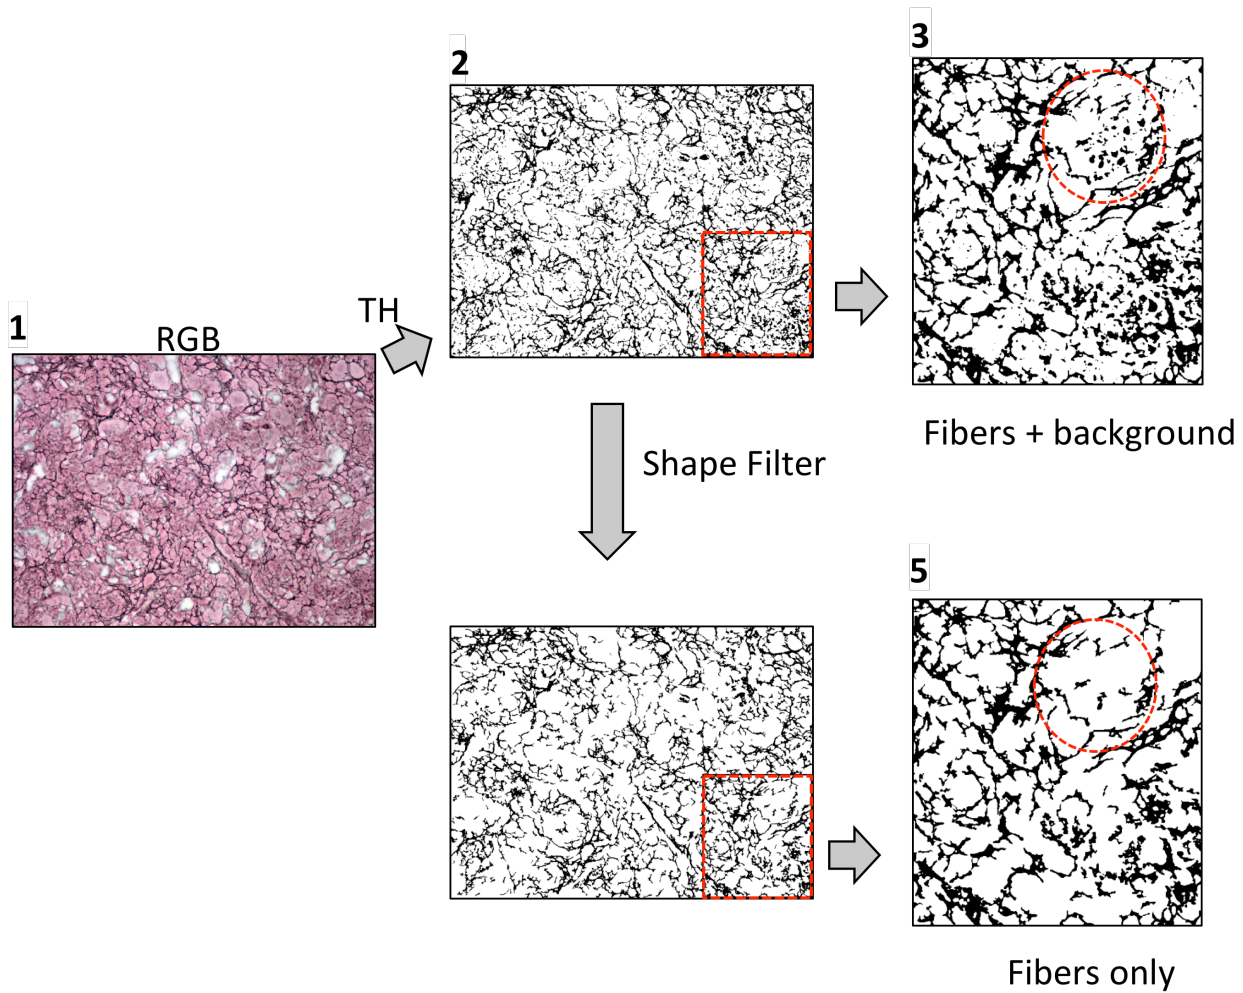

**Supplementary Figure S6. Elimination of Background by Shape Filtering.** The initial RGB image from 30 weeks old Gata-1low male mouse, used as representative analysis (1) is split into grey tone channels (not shown) and then thresholded to retain mostly fiber shapes (2). However, a high background of circular shapes, from stained nuclei, still remains (3, area circled in red). Filtering by shape to eliminate circular elements (4) eliminates the background (5, area circled in red)

## Supplemental Script S1

### Area Correction Macro (IJM extension)

```
1 dir1 = getDirectory("C://Users//UserName//Desktop//In");
2 dir2 = getDirectory("C://Users//UserName//Desktop//Out");
3 setBatchMode(true);
4 list = getFileList(dir1);
5 for (i=0; i<list.length; i++) {
6 showProgress(i+1, list.length);
7 open(dir1+list[i]);
8 setBatchMode(false);
9 waitForUser("Delete bone area and spots, measure Bone Marrow
area");
10 run("Set Measurements...", "area display redirect=None
15decimal=0");
11 run("Measure");
12 saveAs("TIFF", dir2+list[i]);
13 close();
14 }
```

## Supplemental Script S2

### Manual Threshold, Shape-Filter Macro and Quantitation (IJM extension)

```
1 dir1 = getDirectory("C://Users//Hector//Desktop//In");
2 dir2 = getDirectory("C://Users//Hector//Desktop//Out");
3 setBatchMode(true);
4 list = getFileList(dir1);
5 for (i=0; i<list.length; i++) {
6 showProgress(i+1, list.length);
7 open(dir1+list[i]);
8 setBatchMode(false);
9 run("RGB Stack");
10 run("Arrange Channels...", "new=2");
11 run("Threshold...");
12 waitForUser("Set the threshold that will include only fiber
structures");
13 run("Set Measurements...", "integrated limit display redirect=None
decimal=0");
14 run("Measure");
15 run("Convert to Mask", "method=Default background=Light");
16 saveAs("TIFF", dir2+list[i]);
17 close();
18 }
19 macro "2nd"{
20 dir1 = getDirectory("C://Users//Hector//Desktop//In");
21 dir2 = getDirectory("C://Users//Hector//Desktop//Out");
22 setBatchMode(true);
23 list = getFileList(dir1);
24 for (i=0; i<list.length; i++) {
25 showProgress(i+1, list.length);
26 open(dir1+list[i]);
27 setBatchMode(false);
28 run("Invert");
29 run("Shape Filter", "area=70-100000 area_convex_hull=0-Infinity
perimeter=0-Infinity perimeter_convex_hull=0-Infinity
feret_diameter=15-Infinity min._feret_diameter=0-Infinity
long_side_min._bounding_rect.=0-Infinity
short_side_min._bounding_rect.=0-Infinity aspect_ratio=1-Infinity
area_to_perimeter_ratio=1.0-Infinity circularity=30-Infinity
elongation=0-1 convexity=0-1 solidity=0-1 num._of_holes=0-Infinity
thinnes_ratio=0-1 contour_temperatur=0-1 fractal_box_dimension=0-2
option->box-sizes=2,3,4,6,8,12,16,32,64 draw_holes slice");
30 run("Divide...", "value=255 slice");
31 run("Set Measurements...", "integrated limit display
redirect=None decimal=0");
```



```
32 run("Measure");
33 saveAs("TIFF", dir2+list[i]);
34 close();
35 }
```

**Supplementary Table S1. Correlation Between Image Original ID and Its Blind-coded ID**

| Coding from OI-id to #CI-id |                | Coding from #CI-id to 20DCI-id |        |                          | Order of images for input analysis                        |
|-----------------------------|----------------|--------------------------------|--------|--------------------------|-----------------------------------------------------------|
| List #                      | OI-id          | #CI-id                         | #CI-id | 20DCI-id                 | Order of 20DCI-id images in the folder for blind analysis |
| 1                           | 1G30_8_a.tif   | 1.tif                          | 1.tif  | A_OR66X_QU0UX_6FPC2_WZX5 | 0_44PB2_RB8WO_DVIYZ_774M.tif                              |
| 2                           | 1G30_8_a_2.tif | 2.tif                          | 10.tif | N_8CNIV_80EUP_NIMCL_OCWO | 1_NCKCX_DCMV1_1DCI2_HN09.tif                              |
| 3                           | 1G30_8_a_3.tif | 3.tif                          | 11.tif | P_LII0L_YB4HC_9VVTA_N6QU | 2_EO9JP_M2T7F_A767L_7TJX.tif                              |
| 4                           | 1G30_8_a_4.tif | 4.tif                          | 12.tif | B_I2D65_DOI6O_8AOTO_94I1 | 3_08AYB_MPEAH_HAOSD_VVF6.tif                              |
| 5                           | 1G30_8_a_5.tif | 5.tif                          | 13.tif | 4_RO0QW_TDMIJ_6C7UK_HVI0 | 3_TZP8K_HJ559_PPPFN_8Q6H.tif                              |
| 6                           | 1G30_8_a_6.tif | 6.tif                          | 14.tif | 9_D8XNL_SY1GZ_CWIJ1_OC6O | 3_X6TVP_HXEAJ_724HX_6A8W.tif                              |
| 7                           | 1G30_8_b.tif   | 7.tif                          | 15.tif | W_APL2J_ER0QV_ASM2Q_L6A5 | 4_2328S_4CKBV_QJ39Y_MAGJ.tif                              |
| 8                           | 1G30_8_b_2.tif | 8.tif                          | 16.tif | B_DT9BW_FVG6B_U9FVD_E422 | 4_LQKNZ_JO14C_GR2PF_5DXX.tif                              |
| 9                           | 1G30_8_b_3.tif | 9.tif                          | 17.tif | I_8I0U0_6Q910_X14E4_6X8I | 4_RO0QW_TDMIJ_6C7UK_HVI0.tif                              |
| 10                          | 1G30_8_b_4.tif | 10.tif                         | 18.tif | B_EJTET_916LV_QWYTW_L66Q | 7_6XCCG_U0VLU_WJ3W1_DRC0.tif                              |
| 11                          | 1G30_8_b_5.tif | 11.tif                         | 19.tif | R_1GKUG_6CE2T_4I4CP_JZT6 | 7_P97V4_L0VSU_FR6AV_K9KP.tif                              |
| 12                          | 1G30_8_b_6.tif | 12.tif                         | 2.tif  | G_QM3LH_DU9J5_804G1_B3LF | 8_60PGG_UBJ8P_D7VK4_XWED.tif                              |
| 13                          | 1G30_8_c_1.tif | 13.tif                         | 20.tif | C_437YY_9XI4U_MG33M_4848 | 9_D8XNL_SY1GZ_CWIJ1_OC6O.tif                              |
| 14                          | 1G30_8_c_2.tif | 14.tif                         | 21.tif | X_WBNRK_P2CCO_9JH1S_6VSJ | A_OR66X_QU0UX_6FPC2_WZX5.tif                              |

The list of image files is organized in an order convenient for latter calculations. In this example only 14 out of 202 files are shown. The original image ID (OI-id) is first number coded (#CI-id) and then 20 digit coded (20DCI-id) for analysis. As a result, the 20DCI-id list order is also scrambled with respect to the OI-id list order. Finally, the far right column shows that the order of images for input analysis is further scrambled. The number coding step (#CI-id column) was obtained using the public domain Bulk Rename Utility ([http://www.bulkrenameutility.co.uk/Main\\_Intro.php](http://www.bulkrenameutility.co.uk/Main_Intro.php)). Matching colored cells indicate order scrambling. The 20DCI-id was obtained using the BAR utility in ImageJ, as described under Bone Marrow Imaging in Methods. Key: **OI-id**, Original Image id; **#CI-id**, Number Coded Image id; **20DCI-id**, 20 Digits Coded Image id

**Supplementary Table S2. Output data from Macro in Supplementary Script S2**

| <b>Number</b> | <b>Image Name</b> | <b>IntDen</b> | <b>TH</b>  | <b>Average</b> | <b>SD</b>    |
|---------------|-------------------|---------------|------------|----------------|--------------|
| 1             | 1.tif             | 4,511,938     | <b>109</b> | <b>109</b>     | <b>2</b>     |
| 2             | 10.tif            | 3,064,318     | <b>111</b> |                |              |
| 3             | 11.tif            | 3,326,377     | <b>111</b> |                |              |
| 4             | 12.tif            | 2,856,948     | <b>113</b> |                |              |
| 5             | 13.tif            | 3,252,806     | <b>105</b> |                |              |
| 6             | 14.tif            | 5,690,022     | <b>108</b> |                |              |
| 7             | 2.tif             | 6,126,860     | <b>108</b> |                |              |
| 8             | 3.tif             | 5,273,364     | <b>108</b> |                |              |
| 9             | 4.tif             | 3,886,046     | <b>111</b> |                |              |
| 10            | 1.tif             | <b>17,869</b> | 255        | <b>12,295</b>  | <b>4,728</b> |
| 11            | 10.tif            | <b>4,431</b>  | 255        |                |              |
| 12            | 11.tif            | <b>9,491</b>  | 255        |                |              |
| 13            | 12.tif            | <b>7,609</b>  | 255        |                |              |
| 14            | 13.tif            | <b>10,912</b> | 255        |                |              |
| 15            | 14.tif            | <b>17,639</b> | 255        |                |              |
| 16            | 2.tif             | <b>19,863</b> | 255        |                |              |
| 17            | 3.tif             | <b>14,150</b> | 255        |                |              |
| 18            | 4.tif             | <b>8,547</b>  | 255        |                |              |

Typical output results of the dual macro executed in the processing of 9 images. Note that the first sub-macro records the threshold (TH) input by the operator (rows 1-9, column TH). Values in column IntDen are irrelevant for this step. The second sub-macro generates data in rows 10-18, column IntDen. In this step TH column values are irrelevant. The average and standard deviations for TH and IntDen of the 9 images are shown in the far right columns
